# Supplementary material for: Synergistic Ground and Orbital Observations of Iron Oxides on Mt. Sharp and Vera Rubin Ridge
Source: PubMed Central journal article supplement (PMC7539960; doi:10.1029/2019je006294), 2020-09-23
Supplement: JGRE-125-e2019JE006294-s002.pdf [file JGRE-125-e2019JE006294-s002.pdf]

| Sol  | Seq ID    | Filters    | Target Name             | LTST     | Rover Elevation |
|------|-----------|------------|-------------------------|----------|-----------------|
| 758  | mcam03257 | L0-6, R0-6 | Confidence Hills        | 12:07:59 | -4460.6216      |
| 762  | mcam03273 | L0-6, R0-6 | Confidence Hills 2x1    | 13:20:12 | -4460.6216      |
| 771  | mcam03310 | L0-6, R0-6 | Comb Ridge              | 11:34:40 | -4460.6216      |
| 773  | mcam03347 | L0-6, R0-6 | Confidence Hills Dump   | 11:13:31 | -4460.6216      |
| 782  | mcam03413 | L0-6, R0-6 | Confidence Hills Dump 2 | 11:42:04 | -4458.9824      |
| 807  | mcam03538 | L0-6, R0-6 | Pelona Ricardo 1x2      | 11:44:23 | -4460.9048      |
| 812  | mcam03564 | L0-6, R0-6 | Mojave                  | 12:51:49 | -4459.4614      |
| 812  | mcam03565 | L0-6, R0-6 | Rosamund                | 12:54:26 | -4459.4614      |
| 816  | mcam03594 | L0-6, R0-6 | Topanga                 | 11:49:06 | -4458.562       |
| 816  | mcam03595 | L0-6, R0-6 | Afton Canyon            | 11:51:38 | -4458.562       |
| 816  | mcam03596 | L0-6, R0-6 | Punchbowl               | 11:54:27 | -4458.562       |
| 822  | mcam03618 | L0-6, R0-6 | Mescal                  | 11:22:57 | -4456.875       |
| 826  | mcam03629 | L0-6, R0-6 | Puente                  | 11:35:50 | -4456.875       |
| 832  | mcam03653 | L0-6, R0-6 | Pickhandle              | 11:11:28 | -4455.2041      |
| 832  | mcam03654 | L0-6, R0-6 | Goldstone               | 11:14:09 | -4455.2041      |
| 837  | mcam03675 | L0-6, R0-6 | Cowhole Mountain        | 11:59:59 | -4453.7212      |
| 845  | mcam03762 | L0-6, R0-6 | Santa Ana               | 12:09:00 | -4452.6309      |
| 855  | mcam03777 | L0-6, R0-6 | Tecoya                  | 11:55:11 | -4452.6309      |
| 868  | mcam03812 | L0-6, R0-6 | Mini Drill Tailings     | 12:38:01 | -4459.7119      |
| 883  | mcam03851 | L0-6, R0-6 | Mojave2 Drill Tailings  | 12:06:50 | -4459.7119      |
| 895  | mcam03933 | L0-6, R0-6 | Mojave2 Postsieve Dump  | 11:56:45 | -4459.7119      |
| 909  | mcam03977 | L0-6, R0-6 | Telegraph Peak Tailings | 11:36:39 | -4453.5083      |
| 929  | mcam04084 | L0-6, R0-6 | Sanpete                 | 12:15:14 | -4451.0293      |
| 929  | mcam04085 | L0-6, R0-6 | Hoskinnini Ouray        | 12:17:59 | -4451.0293      |
| 935  | mcam04103 | L0-6, R0-6 | Aneth                   | 11:29:00 | -4451.0293      |
| 939  | mcam04120 | L0-6, R0-6 | Hyrum                   | 12:07:12 | -4451.0293      |
| 939  | mcam04121 | L0-6, R0-6 | Telegraph Peak Dump     | 12:10:00 | -4451.0293      |
| 946  | mcam04158 | L0-6, R0-6 | Amboy Jacumba           | 12:28:11 | -4451.042       |
| 949  | mcam04170 | L0-6, R0-6 | Anza Borrego            | 11:30:10 | -4451.042       |
| 955  | mcam04222 | L0-6, R0-6 | Telegraph Peak Dump     | 11:18:32 | -4452.3652      |
| 976  | mcam04311 | L0-6, R0-6 | Albert                  | 10:55:03 | -4456.2212      |
| 990  | mcam04372 | L0-6, R0-6 | Pinedale                | 10:48:43 | -4454.9189      |
| 994  | mcam04399 | L0-6, R0-6 | Red Sleep 1x2 Rall      | 11:45:06 | -4446.9775      |
| 999  | mcam04430 | L0-6, R0-6 | Seely                   | 11:05:38 | -4446.7397      |
| 1001 | mcam04465 | L0-6, R0-6 | Wallace                 | 10:53:11 | -4446.7397      |
| 1030 | mcam04498 | L0-6, R0-6 | Lowary                  | 11:32:00 | -4446.7397      |
| 1032 | mcam04512 | L0-6, R0-6 | Lowary 2                | 12:09:16 | -4446.939       |
| 1033 | mcam04517 | L0-6, R0-6 | Thunderbolt             | 11:24:51 | -4446.939       |
| 1034 | mcam04526 | L0-6, R0-6 | Seeley                  | 11:34:11 | -4446.939       |
| 1041 | mcam04560 | R0-6       | Elk                     | 11:51:16 | -4447.5078      |
| 1041 | mcam04561 | R0-6       | Lamoose                 | 11:53:14 | -4447.5078      |
| 1041 | mcam04562 | L0-6, R0-6 | Mosquito Frog           | 11:55:41 | -4447.5078      |
| 1062 | mcam04672 | L0-6, R0-6 | Buckskin Drill Tailings | 13:00:54 | -4446.8306      |
| 1066 | mcam04689 | L0-6, R0-6 | Buckskin Presieve Dump  | 12:23:47 | -4446.8306      |
| 1090 | mcam04784 | L0-6, R0-6 | Buckskin Dump Pile      | 11:21:29 | -4437.7095      |

|      |           |            |                         |          |            |
|------|-----------|------------|-------------------------|----------|------------|
| 1160 | mcam05245 | L0-6, R0-6 | Bogenfels               | 12:14:39 | -4432.2305 |
| 1167 | mcam05284 | L0-6, R0-6 | Garub                   | 11:56:24 | -4432.3184 |
| 1183 | mcam05361 | L0-6, R0-6 | Narabeb                 | 12:07:54 | -4424.5732 |
| 1204 | mcam05546 | L0-6, R0-6 | Greenhorn Dump Pile     | 13:20:26 | -4419.91   |
| 1219 | mcam05592 | L0-6, R0-6 | Solitaire               | 12:32:05 | -4424.15   |
| 1234 | mcam05705 | L0-6, R0-6 | Sanitatis               | 12:55:37 | -4423.76   |
| 1246 | mcam05813 | L0-6, R0-6 | Kudis                   | 12:06:25 | -4423.43   |
| 1252 | mcam05846 | L0-6, R0-6 | Fiskus                  | 12:50:52 | -4426.54   |
| 1253 | mcam05852 | L0-6, R0-6 | Kuiseb, Dumps R3x1      | 13:18:14 | -4426.54   |
| 1260 | mcam05889 | L0-6, R0-6 | Gorob DRT               | 12:31:56 | -4427.63   |
| 1267 | mcam05932 | L0-6, R0-6 | Stockdale DRT           | 11:52:54 | -4432.08   |
| 1273 | mcam05953 | L0-6, R0-6 | Murray Stimson Contact  | 12:32:10 | -4432.62   |
| 1274 | mcam05965 | L0-6, R0-6 | Schwarzrand DRT         | 12:40:02 | -4432.62   |
| 1276 | mcam05989 | L0-6, R0-6 | Mirabib Lall 2x1 Rall   | 13:22:36 | -4427.36   |
| 1355 | mcam06577 | L0-6, R0-6 | Kunjas                  | 12:43:15 | -4434.87   |
| 1355 | mcam06578 | L0-6, R0-6 | Navachab                | 12:46:16 | -4434.87   |
| 1356 | mcam06595 | L0-6, R0-6 | Inamagando              | 11:58:47 | -4434.87   |
| 1359 | mcam06626 | L0-6, R0-6 | Okoruso Dump Oudam      | 12:44:25 | -4435.59   |
| 1363 | mcam06671 | L0-6, R0-6 | Oudam Drill Hole        | 12:45:04 | -4435.59   |
| 1366 | mcam06683 | L0-6, R0-6 | Oudam Presieve Dump     | 12:27:58 | -4435.59   |
| 1368 | mcam06691 | L0-6, R0-6 | Aubures                 | 13:07:27 | -4435.59   |
| 1373 | mcam06720 | L0-6, R0-6 | Uis                     | 13:10:56 | -4430.25   |
| 1382 | mcam06774 | L0-6, R0-6 | Koes                    | 11:51:07 | -4428.65   |
| 1405 | mcam06879 | L0-6       | Galo                    | 13:16:54 | -4417.31   |
| 1405 | mcam06880 | L0-6       | Guri                    | 13:19:03 | -4417.31   |
| 1417 | mcam06946 | L0-6, R0-6 | Chibia DRT              | 12:39:09 | -4410.83   |
| 1421 | mcam07009 | L0-6, R0-6 | Marimba Drill Tailings  | 13:23:04 | -4410.38   |
| 1421 | mcam07011 | L0-6, R0-6 | Oudam Postsieve Dump    | 13:30:13 | -4410.38   |
| 1425 | mcam07034 | L0-6, R0-6 | Marimba2 Drill Tailings | 11:37:33 | -4410.38   |
| 1427 | mcam07056 | L0-6, R0-6 | Marimba Presieve Dump   | 12:51:29 | -4410.38   |
| 1438 | mcam07111 | L0-6, R0-6 | Conda DRT               | 11:30:16 | -4398.71   |
| 1445 | mcam07152 | L0-6, R0-6 | Ganda DRT               | 12:40:58 | -4393.77   |
| 1458 | mcam07231 | L0-6, R0-6 | Marimba Post Sieve      | 12:12:16 | -4379.46   |
| 1459 | mcam07236 | L0-6, R0-6 | Quela DRT               | 12:11:30 | -4379.46   |
| 1460 | mcam07283 | L0-6, R0-6 | Cuimba                  | 11:47:25 | -4379.46   |
| 1465 | mcam07323 | L0-6, R0-6 | Quela Drill Tailings    | 11:59:33 | -4379.46   |
| 1467 | mcam07337 | L0-6, R0-6 | Quela Presieve Dump     | 11:36:09 | -4379.46   |
| 1475 | mcam07395 | L0-6, R0-6 | Jwaneng                 | 12:12:53 | -4371.23   |
| 1475 | mcam07396 | L0-6, R0-6 | Kopong Munhango         | 12:16:54 | -4371.23   |
| 1478 | mcam07422 | L0-6, R0-6 | Catumbela Caungula      | 12:22:12 | -4370.07   |
| 1485 | mcam07463 | L0-6, R0-6 | Serowe                  | 12:09:15 | -4364.32   |
| 1492 | mcam07509 | L0-6, R0-6 | Sebina DRT + Quela      | 12:01:58 | -4360.75   |
| 1493 | mcam07516 | L0-6, R0-6 | Cahama                  | 12:05:50 | -4360.75   |
| 1496 | mcam07566 | L0-6, R0-6 | Sebina Tailings         | 11:40:34 | -4360.75   |
| 1498 | mcam07582 | L0-6, R0-6 | Sebina Presieve Dump    | 12:12:46 | -4360.75   |
| 1505 | mcam07641 | L0-6, R0-6 | Thrumcap                | 12:04:40 | -4351.81   |
| 1505 | mcam07642 | L0-6, R0-6 | Egg Rock                | 12:06:52 | -4351.81   |

|      |           |            |                         |          |          |
|------|-----------|------------|-------------------------|----------|----------|
| 1508 | mcam07661 | L0-6, R0-6 | Thunder Hole            | 11:31:08 | -4349.51 |
| 1512 | mcam07688 | L0-6, R0-6 | Penobscot DRT           | 11:34:20 | -4349.78 |
| 1520 | mcam07741 | R046       | Hematite Ridge          | 11:56:23 | -4337.92 |
| 1524 | mcam07770 | L0-6, R0-6 | SuttonIsland Manset 2x1 | 11:55:47 | -4336.36 |
| 1532 | mcam07809 | L0-6, R0-6 | Precipice DRT           | 12:02:21 | -4335.8  |
| 1534 | mcam07824 | L0-6, R0-6 | Sebina Post Sieve Dump  | 11:26:57 | -4335.8  |
| 1552 | mcam07972 | L0-6, R0-6 | Western Head            | 11:49:03 | -4335.8  |
| 1566 | mcam07987 | L0-6, R0-6 | Old Soaker              | 12:31:57 | -4335.75 |
| 1566 | mcam07988 | L0-6, R0-6 | Schooner Head           | 12:34:51 | -4335.75 |
| 1571 | mcam07999 | L0-6, R0-6 | Greening Island         | 11:34:24 | -4335.75 |
| 1587 | mcam08091 | L0-6, R0-6 | Belle Lake DRT          | 11:44:25 | -4317.52 |
| 1592 | mcam08115 | L0-6, R0-6 | Hematite Ridge          | 11:56:42 | -4311.29 |
| 1596 | mcam08130 | L0-6, R0-6 | Parker Bog              | 12:02:53 | -4310.43 |
| 1608 | mcam08214 | L0-6, R0-6 | Quoddy Quimby           | 11:38:08 | -4313.46 |
| 1608 | mcam08215 | L0-6, R0-6 | Jemtland                | 11:41:59 | -4313.46 |
| 1610 | mcam08231 | L0-6, R0-6 | Perry                   | 11:17:57 | -4313.44 |
| 1610 | mcam08232 | L0-6, R0-6 | Spurwink                | 11:22:48 | -4313.44 |
| 1624 | mcam08347 | L0-6, R0-6 | Dunn Brook              | 11:48:30 | -4306.63 |
| 1634 | mcam08440 | L0-6, R0-6 | North Haven             | 12:07:16 | -4304.13 |
| 1657 | mcam08597 | L0-6       | Gts Fivemile            | 11:03:07 | -4299.95 |
| 1666 | mcam08643 | L0-6, R0-6 | Moosehead Lake          | 11:44:37 | -4298.57 |
| 1682 | mcam08745 | L0-6, R0-6 | Duck Brook Bridge DRT   | 11:43:07 | -4286.24 |
| 1688 | mcam08786 | L0-6, R0-6 | Eddie Brook             | 12:46:37 | -4280.45 |
| 1693 | mcam08822 | L0-6, R0-6 | Bear Island             | 12:03:36 | -4279.4  |
| 1696 | mcam08845 | L0-6, R0-6 | Mason Point DRT         | 10:58:49 | -4279.19 |
| 1703 | mcam08884 | L0-6, R0-6 | Broad Cove              | 11:20:06 | -4270.38 |
| 1711 | mcam08923 | L0-6, R0-6 | White Ledge             | 12:06:12 | -4267.57 |
| 1714 | mcam08948 | L0-6, R0-6 | Heron Island            | 13:03:22 | -4265.51 |
| 1725 | mcam09004 | L0-6, R0-6 | Haynes Point            | 12:51:30 | -4253.95 |
| 1727 | mcam09015 | L0-6, R0-6 | Freeman Ridge           | 11:59:06 | -4251.66 |
| 1728 | mcam09026 | L0-6, R0-6 | Fernald Point           | 11:53:47 | -4248.72 |
| 1729 | mcam09034 | L0-6, R0-6 | Mark Island             | 12:08:40 | -4247.8  |
| 1734 | mcam09057 | L0-6, R0-6 | Northern Neck           | 12:07:54 | -4246.16 |
| 1737 | mcam09080 | L0-6, R0-6 | Winter Harbor DRT       | 12:25:15 | -4246.41 |
| 1745 | mcam09118 | L0-6, R0-6 | Jobbies Mingo           | 11:53:11 | -4243.45 |
| 1745 | mcam09120 | L0-6, R0-6 | Ld VRR                  | 12:00:00 | -4243.45 |
| 1790 | mcam09243 | L0-6, R0-6 | Zephyr Ledges 2x1       | 11:46:36 | -4225.13 |
| 1797 | mcam09276 | L0-6, R0-6 | Bois Bubert Stereo      | 13:22:03 | -4217.47 |
| 1805 | mcam09310 | R0-6       | Toothacher Island       | 12:57:53 | -4206.88 |
| 1807 | mcam09325 | L0-6, R0-6 | Robinson Rock Gunning   | 12:38:56 | -4206.88 |
| 1812 | mcam09351 | L0-6, R0-6 | Kemps Folly Stereo      | 12:49:53 | -4200.1  |
| 1814 | mcam09364 | L0356      | Weymouth Point          | 12:16:47 | -4198.86 |
| 1819 | mcam09395 | L0-6, R0-6 | Christmas Cove Stereo   | 12:22:38 | -4196.55 |
| 1819 | mcam09396 | R0-6       | Jaquish Ledge           | 12:24:15 | -4196.55 |
| 1821 | mcam09401 | L0-6, R0-6 | Mustards Island         | 12:31:31 | -4195.37 |
| 1822 | mcam09411 | L0-6, R0-6 | Passadumkeag Stereo     | 12:06:29 | -4195.37 |
| 1827 | mcam09449 | L0-6, R0-6 | Sherwood Tableland      | 12:04:44 | -4191.61 |

|      |           |            |                          |          |          |
|------|-----------|------------|--------------------------|----------|----------|
| 1837 | mcam09630 | L0-6, R0-6 | Eccla Lucknow DRT 2x1    | 12:08:45 | -4182.32 |
| 1843 | mcam09640 | L0-6, R0-6 | Iron Mask Stereo         | 12:32:34 | -4180.47 |
| 1850 | mcam09674 | L0-6, R0-6 | Zeederberg Stereo        | 12:07:02 | -4176.74 |
| 1850 | mcam09675 | L0-6, R0-6 | Blinkberg Stereo         | 12:09:33 | -4176.74 |
| 1852 | mcam09683 | L0356      | VRR Region 7             | 12:14:11 | -4174.11 |
| 1864 | mcam09742 | R0-6       | Sibasa Drt               | 11:54:24 | -4174.11 |
| 1866 | mcam09746 | L0-6, R0-6 | VRR Region 6c            | 11:38:45 | -4174.66 |
| 1871 | mcam09783 | L0-6, R0-6 | Platberg DRT Stereo      | 13:06:49 | -4170.47 |
| 1872 | mcam09789 | L0-6, R0-6 | Frisco Stereo            | 12:01:06 | -4168.45 |
| 1876 | mcam09813 | L0-6, R0-6 | Fort Brown DRT           | 12:04:02 | -4168.34 |
| 1876 | mcam09814 | L0-6, R0-6 | Middleton                | 12:05:35 | -4168.34 |
| 1877 | mcam09822 | L0-6, R0-6 | Table Mountain 2x1       | 12:13:30 | -4168.34 |
| 1879 | mcam09830 | L0-6, R0-6 | Natal Stereo             | 11:55:32 | -4166.6  |
| 1885 | mcam09853 | L0-6, R0-6 | Hexriver Stereo          | 11:46:09 | -4166.6  |
| 1893 | mcam09909 | L0-6, R0-6 | Drakensberg DRT Stereo   | 12:36:08 | -4157.98 |
| 1893 | mcam09911 | L0-6, R0-6 | Kamden 1x2               | 12:44:51 | -4157.98 |
| 1899 | mcam09933 | L0-6, R0-6 | Farr 2x1                 | 12:02:10 | -4157.04 |
| 1899 | mcam09934 | L0-6, R0-6 | Muck                     | 12:05:41 | -4157.04 |
| 1905 | mcam09994 | L0-6, R0-6 | Oban Laphroaig           | 12:58:29 | -4154.57 |
| 1906 | mcam10003 | L0-6, R0-6 | Holyrood Haddo House     | 12:25:26 | -4152.91 |
| 1936 | mcam10107 | L0-6, R0-6 | Unst Ross of Mull 2x1    | 12:51:08 | -4149.29 |
| 1939 | mcam10132 | L0-6, R0-6 | Bowmore Stereo L2x1 R3x1 | 12:24:44 | -4149.29 |
| 1950 | mcam10202 | L0-6, R0-6 | Balmedie Stereo 2x1      | 12:53:56 | -4146.66 |
| 1959 | mcam10243 | L0-6, R0-6 | Cocksburnpath_hara 2x1   | 12:02:41 | -4146.38 |
| 1964 | mcam10267 | L0-6, R0-6 | Newmachar DRT            | 12:11:35 | -4146.8  |
| 1964 | mcam10269 | L0-6, R0-6 | St Kilda                 | 12:19:06 | -4146.8  |
| 1964 | mcam10270 | L0-6, R0-6 | Benbecula                | 12:21:05 | -4146.8  |
| 1967 | mcam10287 | L0-6, R0-6 | Loch Ba                  | 12:42:28 | -4146.8  |
| 1967 | mcam10288 | L0-6, R0-6 | Lake Orcadie DRT         | 12:46:12 | -4146.8  |
| 1970 | mcam10306 | L0-6, R0-6 | Ogunquit Dump R2x1       | 12:07:10 | -4146.8  |
| 1978 | mcam10342 | L0-6, R0-6 | Lake Orcadie Tailings    | 11:23:48 | -4146.8  |
| 1980 | mcam10366 | L0-6, R0-6 | Lake Orcadie 2 DRT       | 12:41:01 | -4146.8  |
| 1984 | mcam10386 | L0-6, R0-6 | Lake Orcadie2 Drill Hole | 11:58:28 | -4146.8  |
| 1986 | mcam10410 | L0-6, R0-6 | Braemar                  | 12:08:07 | -4147.32 |
| 1996 | mcam10460 | L0-6, R0-6 | Durness Stereo           | 12:37:20 | -4154.2  |
| 1998 | mcam10471 | L0-6       | Red Hills 4x1            | 12:22:59 | -4155.42 |
| 2000 | mcam10487 | L0356      | Region 12 3x1            | 12:01:16 | -4159.72 |
| 2002 | mcam10505 | L0-6, R0-6 | VRR Region 12            | 13:05:48 | -4159.72 |
| 2002 | mcam10507 | L0-6, R0-6 | Sgurr of Eig & Brora     | 13:14:52 | -4159.72 |
| 2004 | mcam10518 | L0-6, R0-6 | Mousa Stereo             | 11:41:27 | -4159.74 |
| 2005 | mcam10524 | L0-6, R0-6 | Port Ellen Stereo        | 12:11:05 | -4164.62 |
| 2006 | mcam10558 | L0356      | Region 13 5x1            | 11:21:25 | -4164.62 |
| 2007 | mcam10560 | L0-6, R0-6 | Stranraer DRT            | 11:17:47 | -4164.62 |
| 2007 | mcam10561 | L0-6, R0-6 | Burghead Stereo          | 11:21:52 | -4164.62 |
| 2007 | mcam10562 | L0-6, R0-6 | Walls Peninsula Stereo   | 11:24:26 | -4164.62 |
| 2009 | mcam10581 | L0-6, R0-6 | Lanark DRT               | 11:20:27 | -4160.97 |
| 2009 | mcam10583 | L0-6, R0-6 | Stac Fada 2x1/3x3        | 11:26:47 | -4160.97 |

|      |           |            |                                    |          |          |
|------|-----------|------------|------------------------------------|----------|----------|
| 2013 | mcam10610 | L0-6       | Galloway 4x1                       | 11:29:28 | -4155.39 |
| 2014 | mcam10624 | L0-6, R0-6 | Lingarabay DRT                     | 12:50:14 | -4155.39 |
| 2016 | mcam10636 | L0-6, R0-6 | Askival Lall 1x3 Rall              | 11:48:09 | -4152.72 |
| 2029 | mcam10709 | L0-6, R0-6 | Taconite Stereo                    | 11:46:22 | -4165.89 |
| 2034 | mcam10737 | L0-6, R0-6 | Logan                              | 12:40:55 | -4168.18 |
| 2036 | mcam10747 | L0-6, R0-6 | Britt Stereo                       | 12:11:25 | -4175.97 |
| 2036 | mcam10749 | L0-6, R0-6 | Aurora Stereo                      | 12:18:04 | -4175.97 |
| 2041 | mcam10786 | L0-6, R0-6 | Barto Lake & Homer Lake            | 12:32:19 | -4178.79 |
| 2043 | mcam10810 | L0-6, R0-6 | Pigeon River & Bald Eagle Lake 2x1 | 11:31:18 | -4179.22 |
| 2046 | mcam10829 | L0-6, R0-6 | Mud Lake Stereo                    | 13:01:35 | -4180.64 |
| 2050 | mcam10863 | L0-6, R0-6 | Giants Range and Bilbert           | 12:18:26 | -4187.41 |
| 2050 | mcam10865 | L0-6, R0-6 | Floodwood DRT Stereo               | 12:25:51 | -4187.41 |
| 2056 | mcam10897 | L0-6, R0-6 | Duluth DRT stereo                  | 12:21:29 | -4191.28 |
| 2059 | mcam10916 | L0-6, R0-6 | Duluth Drill Stereo                | 11:32:18 | -4191.28 |
| 2081 | mcam11061 | L0-6, R0-6 | Ambridge Stereo                    | 13:12:41 | -4191.28 |
| 2081 | mcam11063 | L0-6, R0-6 | Duluth Dump Pile Stereo            | 13:20:14 | -4191.28 |
| 2091 | mcam11157 | L0-6, R0-6 | Caribou lake                       | 12:21:43 | -4192.42 |
| 2101 | mcam11212 | L0-6, R0-6 | Dumbarton_rock                     | 11:10:11 | -4164.83 |
| 2110 | mcam11271 | L0-6, R0-6 | Voyageurs Stereo                   | 12:58:33 | -4164.35 |
| 2113 | mcam11291 | L0-6, R0-6 | Voyageurs Drill Hole               | 12:09:53 | -4164.35 |
| 2120 | mcam11351 | L0-6, R0-6 | Squrrofeigg Appin Brora            | 12:26:12 | -4157.64 |
| 2122 | mcam11363 | L0-6, R0-6 | Ailsa Craig Stereo                 | 12:15:54 | -4158.73 |
| 2123 | mcam11371 | L0-6, R0-6 | Ailsa Craig Stereo                 | 11:37:47 | -4158.73 |
| 2123 | mcam11373 | L0356      | Peterhead                          | 11:43:06 | -4158.73 |
| 2123 | mcam11374 | L0356      | Taconite Crater Ejecta             | 11:44:25 | -4158.73 |
| 2124 | mcam11377 | L0-6, R0-6 | Lamlash Bay                        | 12:15:24 | -4158.73 |
| 2132 | mcam11431 | L0-6, R0-6 | Dobbs Linn Stereo                  | 12:24:20 | -4167.55 |
| 2135 | mcam11450 | L0-6, R0-6 | Stoer DRT                          | 12:08:44 | -4169.04 |
| 2138 | mcam11468 | L0-6, R0-6 | Stoer Drill Tailings               | 11:53:20 | -4169.04 |
| 2147 | mcam11535 | L0-6, R0-6 | Pentland_Hills                     | 12:06:47 | -4169.04 |
| 2147 | mcam11536 | L0-6, R0-6 | Strontian Stereo                   | 12:09:49 | -4169.04 |
| 2153 | mcam11593 | L0-6, R0-6 | Stoer Portion                      | 11:42:39 | -4169.04 |
| 2160 | mcam11633 | L0-6, R0-6 | Rosie                              | 12:35:46 | -4156.63 |
| 2160 | mcam11634 | L0-6, R0-6 | Rhinns of Galloway                 | 12:38:18 | -4156.63 |
| 2165 | mcam11658 | L0-6, R0-6 | Great Todday                       | 12:02:49 | -4150.12 |
| 2169 | mcam11680 | L0-6, R0-6 | Inverness DRT                      | 12:13:49 | -4149.87 |
| 2169 | mcam11681 | L0-6, R0-6 | Stoneyburn                         | 12:16:35 | -4149.87 |
| 2171 | mcam11693 | L0-6, R0-6 | Inverness Tailings                 | 12:04:20 | -4149.87 |
| 2217 | mcam11747 | L0-6, R0-6 | Inverness                          | 12:39:51 | -4150.11 |
| 2222 | mcam11774 | L0356      | Lake Orcadie Area 2x1              | 11:36:47 | -4146.67 |
| 2225 | mcam11791 | L0-6, R0-6 | Highfield Drill Tailing            | 11:26:28 | -4146.95 |
| 2229 | mcam11824 | L0356      | Slate Islands                      | 11:34:42 | -4146.95 |
| 2229 | mcam11825 | L0356      | Loch Ba 3x1                        | 11:36:06 | -4146.95 |
| 2231 | mcam11838 | L0-6, R0-6 | Slate Islands                      | 11:59:51 | -4146.95 |
| 2231 | mcam11839 | L0-6, R0-6 | Little Todday                      | 12:02:15 | -4146.95 |
| 2235 | mcam11884 | L0356      | Falls of Clyde                     | 11:08:54 | -4146.95 |
| 2246 | mcam12018 | L0-6, R0-6 | Highfield Dump                     | 12:54:52 | -4146.95 |

|      |           |            |                      |          |          |
|------|-----------|------------|----------------------|----------|----------|
| 2247 | mcam12027 | L0356      | Eshanness Coast 2x1  | 12:17:40 | -4146.95 |
| 2255 | mcam12067 | L0-6, R0-6 | Woodhill             | 12:03:55 | -4144.95 |
| 2255 | mcam12069 | L0-6, R0-6 | Newburgh             | 12:11:17 | -4144.95 |
| 2257 | mcam12084 | L0-6, R0-6 | Rock Hall R2x1       | 10:46:44 | -4143.6  |
| 2259 | mcam12088 | L0-6, R0-6 | Gometra              | 11:22:22 | -4143.8  |
| 2262 | mcam12094 | L0-6, R0-6 | Rock Hall Tailings   | 11:56:07 | -4143.8  |
| 2289 | mcam12199 | L0-6, R0-6 | Rock Hall Dump Pile  | 12:02:22 | -4143.8  |
| 2296 | mcam12237 | L0-6, R0-6 | Bothwell DRT         | 11:31:43 | -4143.8  |
| 2299 | mcam12266 | L0-6, R0-6 | Fossil Grove         | 11:50:14 | -4141.05 |
| 2300 | mcam12276 | L0-6, R0-6 | Linlithgow           | 12:17:55 | -4139.85 |
| 2302 | mcam12294 | L0-6, R0-6 | Loch_Ness DRT        | 11:31:20 | -4140.06 |
| 2302 | mcam12295 | L0-6, R0-6 | Loch_Skeen           | 11:33:25 | -4140.06 |
| 2304 | mcam12306 | L0-6, R0-6 | St_Fergus            | 11:43:21 | -4141.97 |
| 2313 | mcam12349 | L0-6, R0-6 | Alba Dun Ara         | 12:03:32 | -4145.4  |
| 2316 | mcam12363 | L0-6, R0-6 | Dauntless_to_Emerald | 11:39:14 | -4147.44 |
| 2319 | mcam12388 | L0-6, R0-6 | Clyde_Gannet         | 12:04:59 | -4148.29 |
| 2319 | mcam12390 | L0-6, R0-6 | Curlew               | 12:12:42 | -4148.29 |
| 2320 | mcam12405 | L0-6, R0-6 | Curlew (redo)        | 12:07:36 | -4148.29 |
| 2338 | mcam12420 | L0-6, R0-6 | Cuttyhill            | 11:13:22 | -4150.33 |
| 2338 | mcam12421 | L0-6, R0-6 | Leslie               | 11:17:06 | -4150.33 |
| 2347 | mcam12448 | L0-6, R0-6 | Arbuthnott Fife      | 12:13:03 | -4150.62 |
| 2349 | mcam12464 | L0-6, R0-6 | Caledonia            | 12:09:31 | -4150.62 |
| 2351 | mcam12472 | L0-6, R0-6 | Muir of Ord          | 11:36:30 | -4150.45 |
